# Supplementary material for: Plastic Mg3(Sb,Bi)2-based thermoelectric compounds with enhanced texture via cold-deformation
Source: Royal Society of Chemistry journal article supplement (doi:10.1039/d4ta00161c), 2024-01-01
Supplement: d4ta00161c1.pdf [file d4ta00161c1.pdf]

## Supplementary Information

### Plastically $\text{Mg}_3(\text{Sb,Bi})_2$ -based thermoelectric compounds with enhanced texture via cold-deformation

Ziming Zhang,<sup>a,b</sup> Zhiqiang Gao,<sup>c</sup> Tingting Deng,<sup>d</sup> Qingfeng Song,<sup>\*a</sup> Lidong Chen,<sup>a</sup> Shengqiang Bai<sup>\*a,b</sup>

*a. State Key Laboratory of High Performance Ceramics and Superfine Microstructure, Shanghai Institute of Ceramics, Chinese Academy of Sciences, Shanghai 200050, China.*

*b. Center of Materials Science and Optoelectronics Engineering, University of Chinese Academy of Sciences, Beijing, 100049, China.*

*c. State Key Laboratory of Metal Matrix Composites, School of Materials Science and Engineering, Shanghai Jiao Tong University, Shanghai 200240, China.*

*d. School of Chemistry and Materials Science, Hangzhou Institute for Advanced Study, University of Chinese Academy of Sciences, Hangzhou 310024, China.*

\*Corresponding author.

E-mail addresses: qfsong@mail.sic.ac.cn (Q.F. Song), bsq@mail.sic.ac.cn (S.Q. Bai).

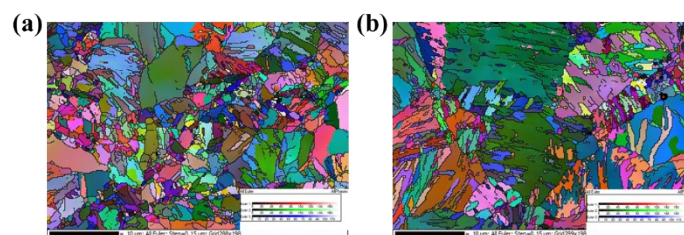

**Fig. S1** EBSD images of  $\text{Mg}_{3.1}\text{Bi}_{1.5}\text{Sb}_{0.49}\text{Te}_{0.01}$  (a) +600 mn sample and (b) +20 mn sample.

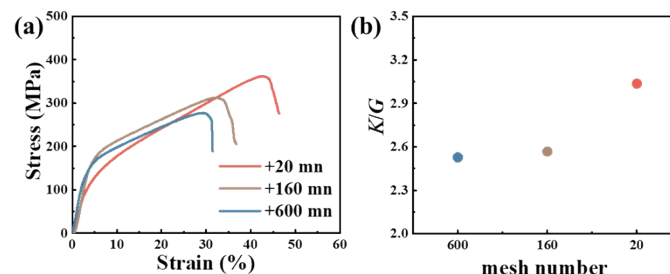

**Fig. S2** (a) Stress-strain curves and (b) calculated  $K/G$  of  $\text{Mg}_{3.1}\text{Bi}_{1.5}\text{Sb}_{0.49}\text{Te}_{0.01}$  samples with different particle size.

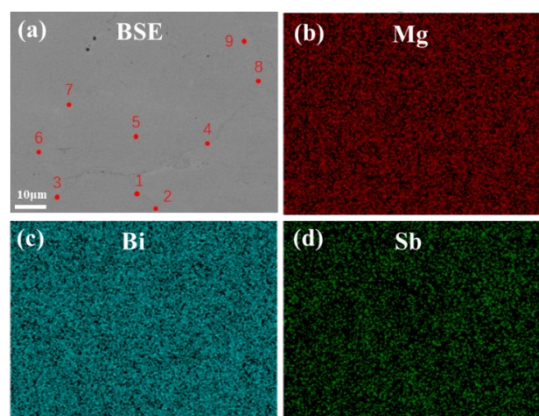

**Fig. S3** (a) SEM image and corresponding EDS composition mapping of (b) Mg, (c) Bi, (d) Sb elements of  $\text{Mg}_{3.1}\text{Bi}_{1.5}\text{Sb}_{0.49}\text{Te}_{0.01}$ .

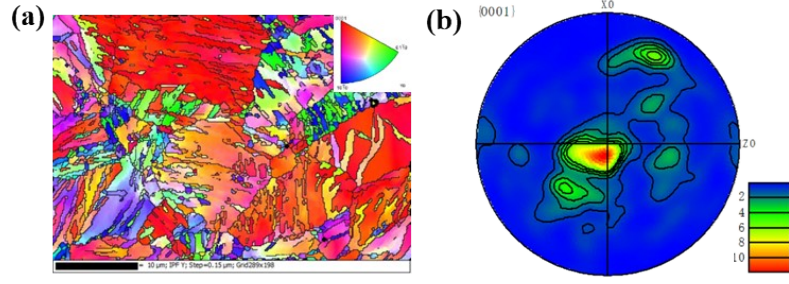

**Fig. S4** (a) Orientation imaging microscopy map and (b) pole figure of (0001) plane obtained from EBSD analysis of +20 nm sample.

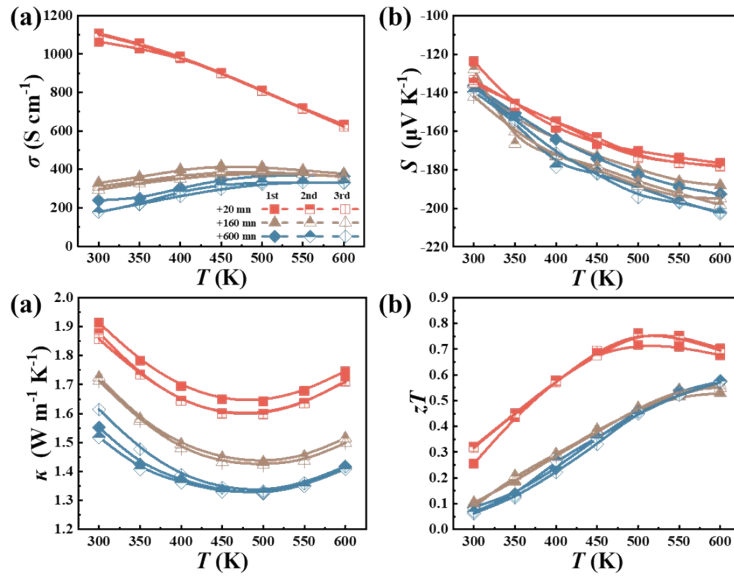

**Fig. S5** Repeated tests of (a) electrical conductivity (b) Seebeck coefficient (c) thermal conductivity and (d) calculated  $zT$  of  $\text{Mg}_{3.1}\text{Bi}_{1.5}\text{Sb}_{0.49}\text{Te}_{0.01}$  samples in 1F.

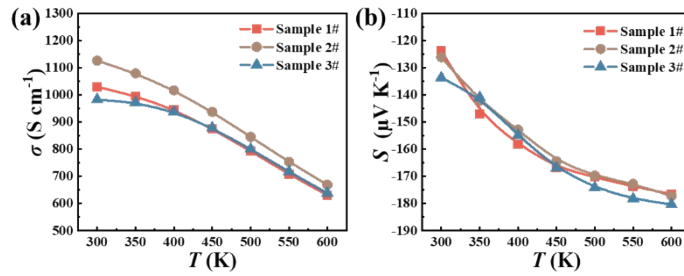

**Fig. S6** Measurement results of (a) electrical conductivity, (b) Seebeck coefficient of the reproduced +20 nm samples.

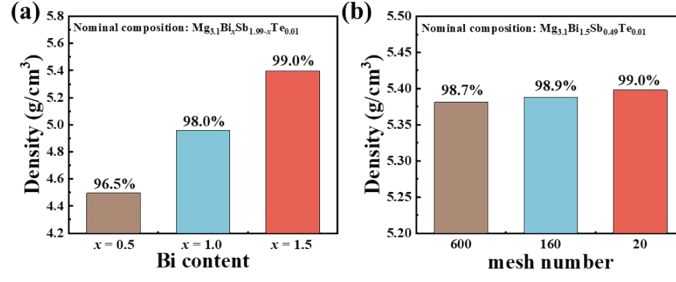

**Fig. S7** Measured densities of the samples of (a)  $\text{Mg}_{3.1}\text{Bi}_x\text{Sb}_{1.99-x}\text{Te}_{0.01}$  ( $x = 0.5, 1.0, 1.5$ ) and (b)  $\text{Mg}_{3.1}\text{Bi}_{1.5}\text{Sb}_{0.49}\text{Te}_{0.01}$  with different particle size. The relative densities of all the samples are marked above the columns.

**Table. S1** Corresponding chemical compositions of the marked points in Fig. S3(a).

| Position | 1    | 2    | 3    | 4    | 5    | 6    | 7    | 8    | 9    | Average | theoretical |
|----------|------|------|------|------|------|------|------|------|------|---------|-------------|
| Mg (at%) | 62.9 | 63.8 | 63.6 | 62.7 | 62.7 | 62.3 | 62.6 | 63.4 | 63.8 | 63.1    | 60.8        |
| Bi (at%) | 26.4 | 27.6 | 25.8 | 29.0 | 28.6 | 29.8 | 27.7 | 27.4 | 25.5 | 27.5    | 29.4        |
| Sb (at%) | 10.7 | 8.5  | 10.6 | 8.2  | 8.7  | 7.9  | 9.7  | 9.2  | 10.7 | 9.4     | 9.8         |
| O (at%)  | 0    | 0.1  | 0    | 0    | 0    | 0    | 0    | 0    | 0    | 0       | 0           |

**Table. S2** Grain boundary content ( $t_{\text{GB}}$ ) and potential barrier height ( $E_{\text{bb}}$ ) in  $\perp\text{F}$  and  $\parallel\text{F}$  of  $\text{Mg}_{3.1}\text{Bi}_{1.5}\text{Sb}_{0.49}\text{Te}_{0.01}$  samples with different particle size.

|         | Grain boundary content ( $t_{\text{GB}}$ ) |                     | Potential barrier height ( $E_{\text{bb}}$ ) |                     |
|---------|--------------------------------------------|---------------------|----------------------------------------------|---------------------|
|         | $\perp\text{F}$                            | $\parallel\text{F}$ | $\perp\text{F}$                              | $\parallel\text{F}$ |
| +20 mn  | 0.00008                                    | 0.0003              | 3.0 meV                                      | 17.4 meV            |
| +160 mn | 0.00085                                    | 0.0017              | 34.6 meV                                     | 44.3 meV            |
| +600 mn | 0.0013                                     | 0.0035              | 62.1 meV                                     | 79.0 meV            |

#### Notes

According to typical band transport equations,<sup>1</sup> the electrical conductivity of each phase can be expressed as:

$$\sigma_i = \sigma_{E_0}(T)sF_{s-1}(\eta_i) \quad (\text{S1})$$

And the Seebeck coefficient can be expressed as:

$$S_i = \frac{k_B}{e} \left[ \frac{(s+1)F_s(\eta_i)}{sF_{s-1}(\eta_i)} - \eta_i \right] \quad (\text{S2})$$

where the subscript  $i$  denotes the phase (bulk phase and GB phase),  $\sigma_{E_0}$  is a transport coefficient that determines the magnitude of conductivity,  $\eta$  is the reduced Fermi-level,  $F_j$  is the Fermi-Dirac integral,  $s$  is a parameter for the conduction mechanism and  $k_B$  is the Boltzmann constant.

Treating the two phases as the series circuit configuration, the total electrical conductivity  $\sigma$  can be calculated by:

$$\sigma^{-1} = (1 - t_{\text{GB}})\sigma_G^{-1} + t_{\text{GB}}\sigma_{\text{GB}}^{-1} \quad (\text{S3})$$

where the subscripts G and GB refer to the bulk phase and grain boundary phase, respectively.  $t_{\text{GB}}$  is the size fraction of the GB phase.

The potential barrier height, which is used to describe the intensity of GBS, was calculated with the following equation:<sup>2</sup>

$$E_{bh} = \begin{cases} \frac{e^2 d^2 N}{8\epsilon} & dN < Q_t \\ \frac{e^2 Q_t^2}{8N\epsilon} & dN > Q_t \end{cases} \quad (S4)$$

where  $E_{bh}$  is the potential barrier height,  $e$  is the elementary charge,  $d$  is the grain size,  $\epsilon$  is the static dielectric constant,  $Q_t$  is the density of trapping states at the grain boundaries and  $N$  is the concentration of ionized impurity atoms.

The total thermal conductivity  $\kappa$  and Seebeck coefficient  $S$  can be further expressed as:

$$\kappa^{-1} = (1 - t_{GB})\kappa_G^{-1} + t_{GB}\kappa_{GB}^{-1} \quad (S5)$$

$$S = \frac{S_G \frac{1 - t_{GB}}{\kappa_G} + S_{GB} \frac{t_{GB}}{\kappa_{GB}}}{\frac{1 - t_{GB}}{\kappa_G} + \frac{t_{GB}}{\kappa_{GB}}} \quad (S6)$$

Since  $t_{GB}$  is very small and  $S_i$  and  $\kappa_i$  are similar in orders of magnitude between the bulk phase and the GB phase, eqn (S6) can be reduced to:<sup>3</sup>

$$S \approx S_G \quad (S7)$$

## Reference

1. S. D. Kang and G. J. Snyder, *Nat. Mater.*, 2016, **16**, 252-257.
2. C. L. Hu, K. Y. Xia, C. G. Fu, X. B. Zhao and T. J. Zhu, *Energy Environ. Sci.*, 2022, **15**, 1406-1422.
3. J. J. Kuo, S. D. Kang, K. Imasato, H. Tamaki, S. Ohno, T. Kanno and G. J. Snyder, *Energy Environ. Sci.*, 2018, **11**, 429-434.
